# Supplementary material for: Development of Attenuated Viruses for Effective Protection against Pepper Veinal Mottle Virus in Tomato Crops
Source: MDPI journal article supplement (doi:10.3390/v16050687), 2024-04-26
Supplement: s1 [file s1]

**Table S1.** Nucleotide sequences of the primers used in this study.

| Primer name   | Direction <sup>a</sup> | 5' → 3'                                               |
|---------------|------------------------|-------------------------------------------------------|
| PVMV-TW-1-Stu | F                      | GCAAGTACAGGCCTAAAAAATTAAACATCTCAT<br>ACAAACAAATACGAAA |
| PVMV-3031c    | R                      | CCGCCTGTACATGACTTTCTTG                                |
| PVMV-2361     | F                      | CACTAACAACTGGGTACCACATCCTCAAAGCTA<br>ACAC             |
| PVMV-5681c    | R                      | GCCACACCAGCACCAATCAA                                  |
| PVMV-5561     | F                      | CGGCGCTATGGAAACTGTCA                                  |
| PolyT Not     | R                      | CGTTTTTTTTTGCGGCCGCTTTTTTTTTTTTTTTTTT                 |

<sup>a</sup> F and R represent the primers are designed in forward and reverse directions, respectively.
