# Supplementary material for: Development of Attenuated Viruses for Effective Protection against Pepper Veinal Mottle Virus in Tomato Crops
Source: MDPI journal article supplement (doi:10.3390/v16050687), 2024-04-26
Supplement: s1 [file s1]

**Table S2.** Whole-genome comparison of pepper veinal mottle virus (PVMV) isolate Tn with other PVMV isolates.

| <b>Virus isolate</b> | <b>Accession number</b> | <b>Host</b>                 | <b>Location</b> | <b>nt (%)</b> | <b>aa (%)</b> |
|----------------------|-------------------------|-----------------------------|-----------------|---------------|---------------|
| Tn                   | OR355467                | <i>Solanum lycopersicum</i> | Taiwan          | 100.0         | 100.0         |
| Xs-1                 | OR355466                | <i>Capsicum annuum</i>      | Taiwan          | 97.5          | 97.7          |
| ns1                  | FJ617225                | <i>S. nigrum</i>            | Taiwan          | 97.8          | 98.0          |
| HNu                  | MN082715                | <i>C. chinense</i>          | China           | 98.0          | 98.2          |
| OKP2                 | LC438540                | <i>C. annuum</i>            | Japan           | 97.8          | 97.9          |
| OKP3                 | LC438541                | <i>C. annuum</i>            | Japan           | 98.0          | 98.0          |
| OKC25                | LC438542                | <i>C. annuum</i>            | Japan           | 97.8          | 97.9          |
| OKP30                | LC438543                | <i>C. annuum</i>            | Japan           | 97.8          | 97.8          |
| OKP39                | LC438544                | <i>C. annuum</i>            | Japan           | 97.8          | 97.9          |
| OKP41                | LC438545                | <i>C. frutescens</i>        | Japan           | 97.8          | 97.8          |
| P                    | NC_011918               | <i>C. frutescens</i>        | Ghana           | 98.1          | 97.1          |
| DSMZ<br>PV-0257      | MZ405642                | <i>C. frutescens</i>        | Ghana           | 98.3          | 98.1          |
| DSMZ<br>PV-0563      | OP722584                | <i>S. lycopersicum</i>      | Nigeria         | 93.7          | 95.4          |
| DSMZ<br>PV-0551      | OQ102061                | <i>Capsicum</i> spp.        | Nigeria         | 93.1          | 95.1          |
| Camb 2               | OK558746                | <i>Capsicum</i> spp.        | Senegal         | 83.7          | 89.8          |
| Malika-1             | OK558747                | <i>Capsicum</i> spp.        | Senegal         | 93.2          | 95.2          |
