# Supplementary material for: Development of Attenuated Viruses for Effective Protection against Pepper Veinal Mottle Virus in Tomato Crops
Source: MDPI journal article supplement (doi:10.3390/v16050687), 2024-04-26
Supplement: s1 [file s1]

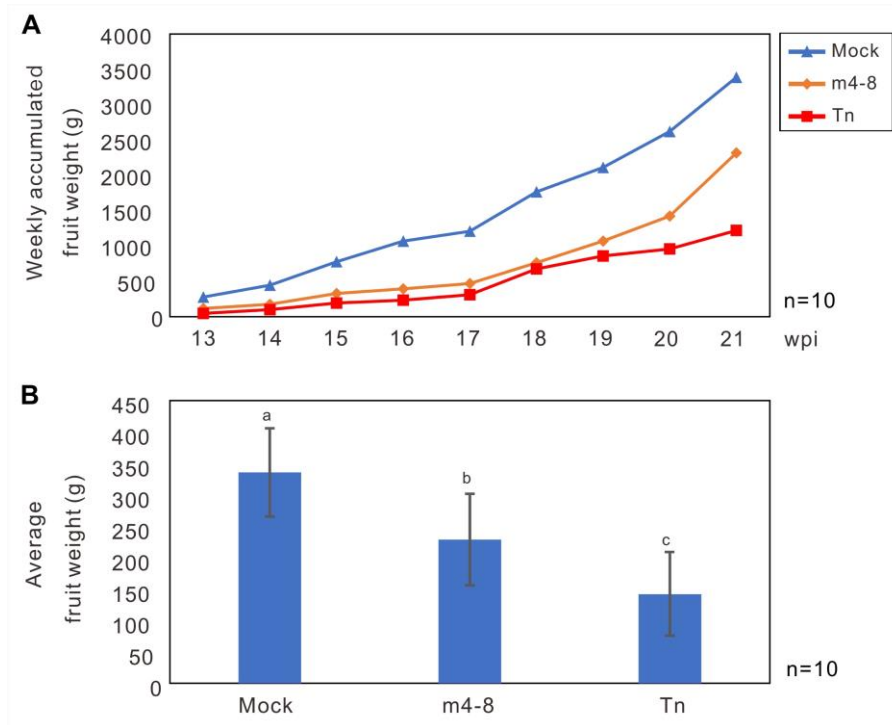

**Figure S6. Fruit yield evaluation of tomato plants protected with the pepper veinal mottle virus (PVMV) mutant m4-8 under greenhouse conditions. (A)** The weekly accumulation of tomato fruit yield (n=10) was recorded at 13-21 weeks post-inoculation (wpi). **(B)** Average total tomato fruit yield per tomato plant (n=10). Different letters (a-c) above the bars denote significant differences (Mann-Whitney *U* test,  $p < 0.05$ ) [37]. Mock inoculation was used for comparison.
