# Supplementary material for: Development of Attenuated Viruses for Effective Protection against Pepper Veinal Mottle Virus in Tomato Crops
Source: MDPI journal article supplement (doi:10.3390/v16050687), 2024-04-26
Supplement: s1 [file s1]

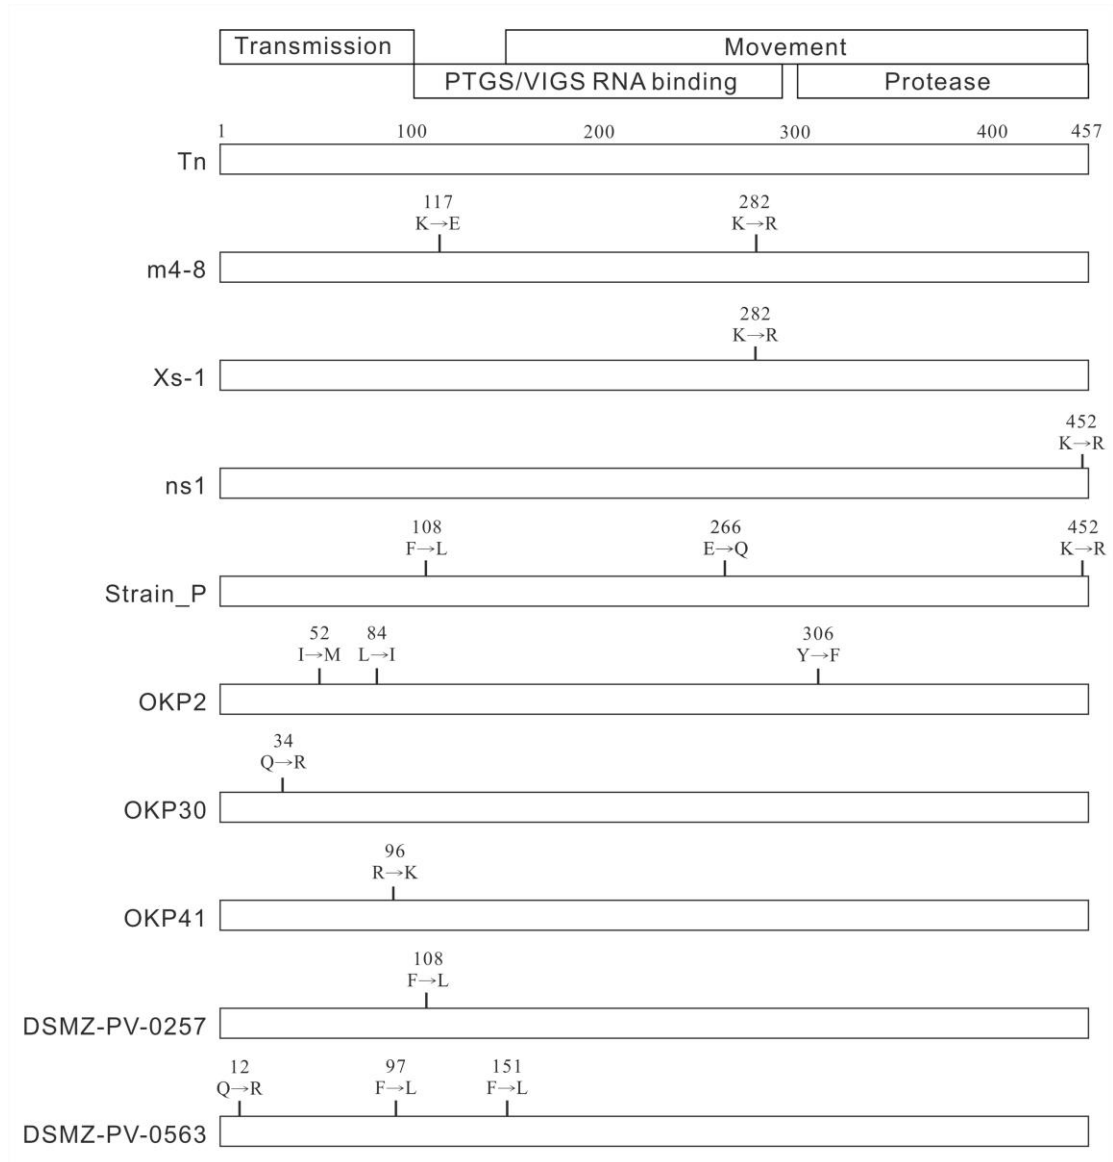

**Figure S5. Amino acid differences within the HC-Pro of different pepper vein mottle virus (PVMV) isolates.** The HC-Pro of PVMV Tn was used as a comparison standard. The letters on the left indicate the amino acid residues of PVMV Tn. The letters on the right indicate different amino acid residues.
