# Supplementary material for: Development of Attenuated Viruses for Effective Protection against Pepper Veinal Mottle Virus in Tomato Crops
Source: Viruses. 2024 Apr 26;16(5):687. doi: 10.3390/v16050687 (PMC11125906; doi:10.3390/v16050687)
Supplement: Supplementary file 1 [file viruses-16-00687-s001.zip]

Archive with 8 entries (8 files):
- Fig S1_PVMV accumulation in Nb.pdf
- Fig S2_Protection and DSI in Nb.pdf
- Fig S3_Protection against Xs-1 in Nb.pdf
- Fig S4_Protection days.pdf
- Fig S5_HC-Pro alignment.pdf
- Fig S6_Fruit yield.pdf
- Table S1_Primers-1.pdf
- Table S2_Genome comparison.pdf
